# Supplementary material for: Gamma-Aminobutyric Acid Enhances Cadmium Phytoextraction by Coreopsis grandiflora by Remodeling the Rhizospheric Environment
Source: MDPI journal article supplement (doi:10.3390/plants12071484), 2023-03-28
Supplement: s1 [file s1]

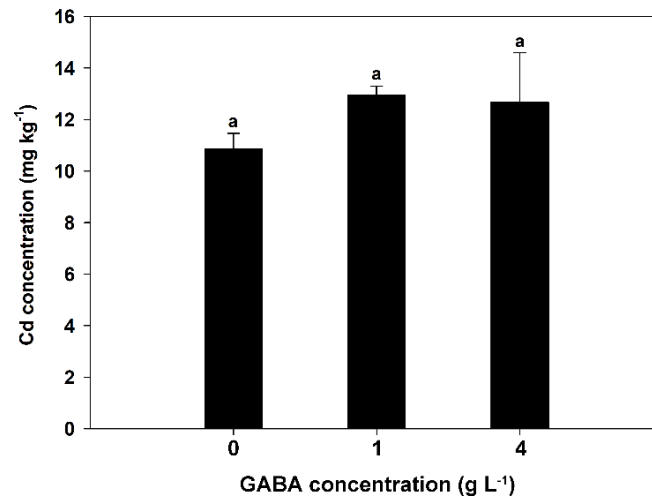

**Figure S1.** Cd concentrations in residual soils after leaching with 0, 1, and 4 g L<sup>-1</sup> GABA. Bars labelled with the same letter (a) indicate no significant difference ( $p > 0.05$ , Duncan's test, one-way ANOVA) between groups.

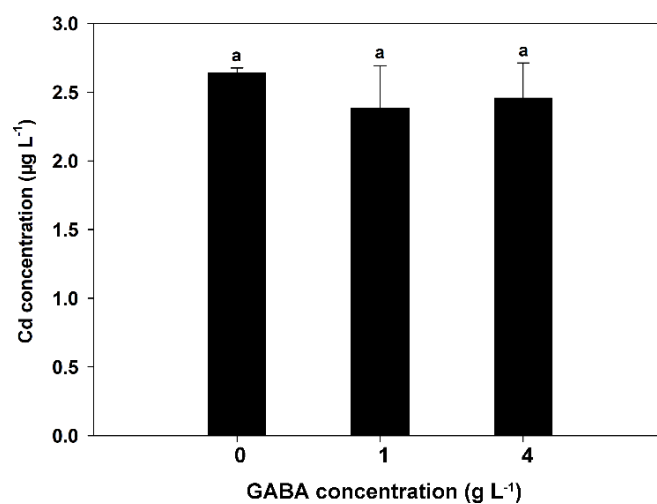

**Figure S2.** Cd concentrations in filtrates after leaching with 0, 1, and 4 g L<sup>-1</sup> GABA. Bars labelled with the same letter (a) indicate no significant difference ( $p > 0.05$ , Duncan's test, one-way ANOVA) between groups.
