# Supplementary material for: Gamma-Aminobutyric Acid Enhances Cadmium Phytoextraction by Coreopsis grandiflora by Remodeling the Rhizospheric Environment
Source: Plants (Basel). 2023 Mar 28;12(7):1484. doi: 10.3390/plants12071484 (PMC10096890; doi:10.3390/plants12071484)
Supplement: Supplementary file 1 [file plants-12-01484-s001.zip › Supplementary Tables.xlsx]

## Sheet: Table S1
Table S1 Physicochemical parameters of the homogenized soil.
Indice	Unit	Value
pH	/	5.48
Organic matter	g kg-1	192
Cation exchange capacity	cmol(+) kg-1	19.1
Total nitrogen	g kg-1	6.16
Total phosphorus	g kg-1	0.524
Total potassium	g kg-1	6.3
Total cadmium	mg kg-1	12.5

## Sheet: Table S2
Table S2 Basic information of 16S rDNA sequencing results.
Sample name	Raw reads	Clean reads	Total tags	Taxon tags	Total OTUs	Bacterial OTUs	Mean	Sig.*
T1-1	131474	131346	116671	55295	5019	4994	4791	a
T1-2	128039	127916	114376	56531	4695	4652
T1-3	122237	122136	109448	54618	4751	4727
T3-1	132411	132285	118081	58506	4783	4757	4747	a
T3-2	134136	134015	119530	59614	4921	4884
T3-3	125853	125734	112183	57824	4634	4600
T5-1	120868	120777	108359	53535	3943	3928	4042.33	b
T5-2	129522	129415	115556	59082	4068	4053
T5-3	128197	128071	114006	58061	4164	4146
						ANOVA	F value	24.621
							P value	0.001
							DF	2
* Different letters indicate significant differences (p < 0.05, Duncan’s test, one-way ANOVA) among different groups. DF: degree of freedom.

## Sheet: Table S3
Table S3 Alpha diversity index of bacterial community.
Index	Shannon	Mean	Sig.*	Simpson	Mean	Sig.	Chao1	Mean	Sig.	Ace	Mean	Sig.
T1-1	10.2195	10.1733	a	0.997346	0.99726	a	5280.05	5092.36	a	5711.67	5496.18	a
T1-2	10.1463			0.9973			4958.48			5343.07
T1-3	10.154			0.997134			5038.56			5433.79
T3-1	9.497	9.48579	b	0.988579	0.988709	b	5124.78	5125.82	a	5582.76	5577.03	a
T3-2	9.5821			0.990186			5258.91			5719.76
T3-3	9.37827			0.987362			4993.77			5428.58
T5-1	8.84581	8.85577	c	0.984807	0.985335	c	4364.3	4453.78	b	4762.35	4870.43	b
T5-2	8.72817			0.984192			4436.75			4857.7
T5-3	8.99332			0.987006			4560.3			4991.25
	ANOVA	F value	131.358	ANOVA	F value	80.832	ANOVA	F value	23.292	ANOVA	F value	18.872
		P value	0		P value	0		P value	0.001		P value	0.003
		DF	2		DF	2		DF	2		DF	2
* Different letters indicate significant differences (p < 0.05, Duncan’s test, one-way ANOVA) among different groups. DF: degree of freedom.

## Sheet: Table S4
Table S4 Relative abundance (%) of the top 21 bacterial phyla in cadmium-contaminated soils treated with different GABA concentrations.
Phylum	T1-1	T1-2	T1-3	T3-1	T3-2	T3-3	T5-1	T5-2	T5-3
Proteobacteria	31.1291	31.2269	31.1298	38.0601	37.888	38.8322	43.5815	42.207	41.7147
Patescibacteria	15.8409	16.4055	16.7176	18.4101	17.0544	18.1606	12.0799	11.5796	13.0975
Bacteroidetes	7.0788	8.098	8.1491	8.2962	7.8284	8.0832	11.7918	16.0775	12.8801
Actinobacteria	7.0133	6.1099	6.955	5.6914	6.3279	5.9236	8.9093	8.8347	9.3608
Acidobacteria	9.6292	9.8895	9.1555	6.3173	6.998	6.6875	4.9606	4.7895	5.3101
Planctomycetes	6.8897	6.749	6.679	5.6709	5.6308	5.0813	5.0467	3.6705	4.0369
Chloroflexi	5.0991	4.8301	4.679	3.5857	4.3126	4.0198	2.3045	2.4329	2.586
Gemmatimonadetes	4.2393	4.0745	3.9595	3.4845	3.9935	3.4769	3.2454	3.0415	3.057
Verrucomicrobia	3.5812	3.6958	3.5345	2.8123	2.6736	2.887	3.3333	3.1789	3.1381
Chlamydiae	1.7233	1.9535	1.9191	1.7217	1.8162	1.4722	0.9727	0.7934	0.8126
Elusimicrobia	0.9326	0.9777	0.9991	0.6242	0.5553	0.5377	0.2563	0.1814	0.2156
Dependentiae	0.4563	0.5262	0.4085	0.499	0.4675	0.5081	0.404	0.334	0.4382
Cyanobacteria	0.5017	0.2949	0.3496	0.4647	0.2667	0.4072	0.1365	0.1882	0.3951
Armatimonadetes	0.4163	0.3841	0.3661	0.2881	0.238	0.2732	0.159	0.1187	0.1725
Nitrospirae	0.22	0.1966	0.2447	0.2075	0.3123	0.2071	0.1085	0.1475	0.1104
Omnitrophicaeota	0.1854	0.2713	0.2558	0.1783	0.1249	0.1392	0.0917	0.0644	0.0863
BRC1	0.04	0.0328	0.0368	0.0703	0.0473	0.0713	0.3423	0.3323	0.3381
Fibrobacteres	0.3236	0.2858	0.2521	0.1063	0.1232	0.127	0.0131	0.0186	0.0431
Firmicutes	0.1218	0.1238	0.1251	0.0755	0.1249	0.0974	0.1216	0.0915	0.1139
Hydrogenedentes	0.1963	0.1456	0.2042	0.1183	0.1131	0.0731	0.043	0.0543	0.0449
Spirochaetes	0.1709	0.1147	0.1159	0.0806	0.0827	0.0905	0.0374	0.0356	0.0242

## Sheet: Table S5
Table S5 Relative abundance (%) of the top 98 bacterial genera in cadmium-contaminated soils treated with different GABA concentrations.
Genus	T1-1	T1-2	T1-3	T3-1	T3-2	T3-3	T5-1	T5-2	T5-3
Pseudomonas	0.3618	0.3204	0.3477	2.826	2.3394	4.2774	11.1558	11.2524	8.9226
Sphingomonas	2.2196	2.1428	2.3293	2.8774	2.9234	2.5877	4.6688	4.1893	4.2802
Pseudogulbenkiania	0.1127	0.1347	0.1877	7.4405	7.0064	7.4724	1.2476	1.0918	1.4975
Pseudarthrobacter	0.8617	0.8357	1.034	1.7628	1.7267	1.8672	4.0871	4.1097	4.3578
MND1	2.1105	2.192	2.1601	1.6153	1.7571	1.4705	1.1784	1.0817	1.249
Bryobacter	1.9106	1.857	1.7847	1.1849	1.3368	1.2477	0.9091	0.9206	1.0127
Pseudolabrys	1.5452	1.4947	1.4903	1.1523	1.3655	1.2129	1.3561	1.08	1.3715
Gemmatimonas	1.587	1.4383	1.3652	1.1849	1.2997	1.1677	1.1504	1.0749	1.0765
Flavobacterium	0.3236	0.5243	0.4563	0.3858	0.2853	0.3446	2.456	3.9198	1.6613
Bdellovibrio	0.16	0.2185	0.184	0.6859	0.5435	0.7639	1.7396	2.5041	2.1616
Haliangium	1.1816	1.3381	1.2787	0.9894	1.0499	0.978	0.4602	0.3866	0.3692
Pedobacter	0.0818	0.0655	0.1067	0.3018	0.216	0.2593	1.691	2.5567	1.6527
Bradyrhizobium	0.6181	0.5425	0.6679	0.7322	0.6414	0.6404	1.0381	0.924	0.9523
Pirellula	0.8253	0.8466	0.9071	0.8694	0.7849	0.8405	0.5873	0.4764	0.5089
Terrimonas	0.689	0.8193	0.8629	0.5642	0.6346	0.7013	0.5948	0.7138	0.59
Candidatus_Solibacter	0.7381	0.7464	0.6421	0.5539	0.4979	0.5029	0.419	0.3493	0.3778
SWB02	0.5617	0.6791	0.5593	0.5384	0.454	0.4281	0.3199	0.3713	0.3123
Acidibacter	0.5399	0.7938	0.6366	0.4373	0.4102	0.4002	0.3348	0.3069	0.3399
Bauldia	0.5563	0.5553	0.5869	0.4356	0.4979	0.4594	0.2862	0.3832	0.383
Reyranella	0.5199	0.5225	0.471	0.3687	0.3831	0.3289	0.4527	0.2984	0.3813
Flavisolibacter	0.3127	0.3168	0.3606	0.3361	0.3578	0.3811	0.5312	0.5561	0.559
Arenimonas	0.2672	0.2622	0.2447	0.4321	0.4372	0.4716	0.5425	0.5663	0.4796
Dongia	0.4163	0.386	0.3993	0.4441	0.449	0.3881	0.3217	0.2611	0.4365
Lacunisphaera	0.6053	0.5735	0.5777	0.3018	0.238	0.308	0.2525	0.2391	0.2467
IS-44	0.4999	0.4388	0.4213	0.3069	0.3545	0.3254	0.1665	0.2374	0.2622
Luteimonas	0.0945	0.1056	0.0994	0.1646	0.1182	0.1671	0.7931	0.7951	0.6487
Streptomyces	0.3781	0.2895	0.3257	0.1938	0.2211	0.1932	0.462	0.4984	0.4037
Nitrosospira	0.0618	0.0528	0.0442	0.1938	0.2312	0.2245	0.7931	0.568	0.7332
Alterococcus	0.4636	0.4988	0.3588	0.2349	0.1958	0.2262	0.1964	0.2018	0.176
Aquicella	0.2472	0.2603	0.2705	0.4973	0.4321	0.3724	0.1571	0.1407	0.1432
Rhodoplanes	0.3199	0.335	0.3091	0.2692	0.3072	0.2123	0.217	0.1882	0.2174
Gaiella	0.3454	0.3168	0.3238	0.2109	0.3055	0.2019	0.1684	0.2001	0.1415
Paenarthrobacter	0.0782	0.0929	0.0865	0.1578	0.1283	0.1653	0.4508	0.5069	0.5365
Burkholderia-Caballeronia-Paraburkholderia	0.0873	0.0674	0.1104	0.3292	0.2228	0.2506	0.3947	0.3323	0.3933
Iamia	0.3018	0.2167	0.2723	0.2212	0.2515	0.221	0.1777	0.1916	0.2605
Nordella	0.2563	0.2476	0.2705	0.2555	0.2464	0.2541	0.1665	0.1661	0.1656
Planctopirus	0.2709	0.233	0.2778	0.2572	0.2549	0.2158	0.1889	0.1322	0.1846
Ohtaekwangia	0.1363	0.1129	0.1104	0.1646	0.1333	0.1653	0.2993	0.3882	0.4089
Nocardioides	0.2072	0.1438	0.2061	0.1612	0.1874	0.1497	0.2376	0.317	0.3071
Gemmata	0.2618	0.3259	0.2742	0.2006	0.2363	0.1862	0.2039	0.0949	0.1328
Opitutus	0.3381	0.3204	0.2723	0.1801	0.1603	0.2001	0.0991	0.1628	0.1518
Marmoricola	0.2581	0.1711	0.1914	0.1526	0.1384	0.1288	0.2132	0.256	0.2864
Mesorhizobium	0.1254	0.0983	0.1067	0.1269	0.184	0.1427	0.3124	0.3086	0.383
Nitrospira	0.22	0.1966	0.241	0.2075	0.3123	0.2071	0.1085	0.1475	0.1104
Dokdonella	0.2	0.1875	0.1858	0.2006	0.1266	0.1932	0.2544	0.1678	0.2105
Chitinophaga	0.0255	0.0164	0.0202	0.0257	0.0236	0.0122	0.4676	0.5849	0.5417
Rhodanobacter	0.0782	0.0801	0.0607	0.048	0.076	0.0592	0.4508	0.4222	0.4037
Roseimicrobium	0.0454	0.031	0.0515	0.2349	0.1384	0.2019	0.3573	0.2696	0.3416
AKYG587	0.2763	0.304	0.2447	0.1612	0.1603	0.1462	0.1216	0.1475	0.088
Subgroup_10	0.1963	0.2421	0.2024	0.1646	0.1722	0.1775	0.0991	0.1594	0.2036
Sphingopyxis	0.0291	0.0473	0.035	0.0309	0.027	0.0331	0.5462	0.4544	0.4123
Hirschia	0.2563	0.2094	0.2392	0.2126	0.135	0.1479	0.1291	0.1204	0.1328
CL500-29_marine_group	0.2218	0.244	0.2502	0.1338	0.2194	0.1845	0.1029	0.0848	0.0742
Allorhizobium-Neorhizobium-Pararhizobium-Rhizobium	0.1109	0.0947	0.0994	0.2178	0.1215	0.1392	0.2001	0.2679	0.2139
ADurbBin063-1	0.2145	0.213	0.219	0.1732	0.1502	0.1879	0.1178	0.0831	0.0897
Hyphomicrobium	0.1927	0.1693	0.1877	0.1132	0.1418	0.1444	0.1515	0.1339	0.157
Ellin6067	0.1709	0.1693	0.2079	0.1372	0.162	0.141	0.1216	0.1187	0.1277
Massilia	0.1527	0.1256	0.1104	0.2246	0.2363	0.1775	0.0692	0.0576	0.0966
Phenylobacterium	0.1909	0.2676	0.173	0.132	0.0928	0.1149	0.0917	0.0865	0.1001
SM1A02	0.1763	0.1548	0.1564	0.2092	0.1418	0.1357	0.1104	0.0831	0.0811
Pir4_lineage	0.1691	0.1456	0.1435	0.1543	0.1485	0.1444	0.0973	0.1204	0.0914
UTBCD1	0.1763	0.2877	0.184	0.1046	0.1215	0.0922	0.0505	0.0543	0.0707
UTCFX1	0.1454	0.0892	0.1325	0.1132	0.265	0.1601	0.0711	0.0661	0.0621
Singulisphaera	0.0345	0.0309	0.0368	0.036	0.0354	0.0679	0.318	0.317	0.2225
Pseudoxanthomonas	0.0036	0.0073	0.0037	0.0069	0.0034	0.0104	0.1609	0.4849	0.4054
Ensifer	0.0291	0.0146	0.0442	0.0772	0.0523	0.087	0.2058	0.2916	0.2691
Legionella	0.0618	0.0401	0.0662	0.1886	0.1519	0.1636	0.101	0.1	0.1587
Luteolibacter	0.0291	0.02	0.0313	0.0309	0.0304	0.0818	0.2806	0.2662	0.2502
SH-PL14	0.0945	0.1202	0.1141	0.132	0.1435	0.1566	0.1197	0.0492	0.0604
Prosthecobacter	0.0036	0	0.0037	0.0634	0.0591	0.0522	0.245	0.2577	0.2795
Occallatibacter	0.14	0.2112	0.1012	0.0737	0.1097	0.0992	0.0767	0.0627	0.0828
Parafilimonas	0.0818	0.0983	0.0865	0.0737	0.0979	0.1062	0.1235	0.1577	0.1259
Flavitalea	0.0382	0.0601	0.0773	0.0806	0.103	0.0888	0.1478	0.1746	0.1691
Variovorax	0.0327	0.031	0.035	0.0566	0.0776	0.0418	0.2226	0.2085	0.1656
Asticcacaulis	0.0236	0.0091	0.0166	0.0995	0.0574	0.0835	0.1515	0.1441	0.2709
Achromobacter	0.0091	0.0109	0.0092	0.0017	0	0.0122	0.2469	0.295	0.176
Sporichthya	0.1218	0.0892	0.1398	0.0446	0.0962	0.0905	0.0599	0.0492	0.0587
Fluviicola	0.0018	0.0055	0.0074	0.0429	0.027	0.0383	0.1534	0.2543	0.2122
Zavarzinella	0.1745	0.1074	0.1417	0.0652	0.081	0.0522	0.0337	0.0356	0.0242
Sandaracinus	0.0673	0.0783	0.0754	0.1338	0.0928	0.0888	0.043	0.0509	0.0673
Roseiarcus	0.1054	0.1202	0.0754	0.0463	0.076	0.0626	0.0748	0.0593	0.0638
Devosia	0.0182	0.0109	0.0166	0.0206	0.0169	0.0348	0.2189	0.1526	0.1846
Spirochaeta_2	0.1509	0.1038	0.1086	0.0703	0.0658	0.0783	0.0374	0.0339	0.019
Pedosphaera	0.0927	0.102	0.1104	0.0669	0.0641	0.0557	0.0673	0.0576	0.0414
Qipengyuania	0.0345	0.0237	0.0331	0.0412	0.0236	0.0713	0.1029	0.1407	0.119
Rhodococcus	0.0109	0.0091	0.0184	0.0514	0.0439	0.0626	0.1197	0.1221	0.1363
Pedomicrobium	0.1091	0.0856	0.0699	0.0343	0.0675	0.0574	0.0262	0.0458	0.0518
Nannocystis	0.0654	0.0765	0.0589	0.1132	0.0709	0.1044	0.0094	0.0136	0.0121
Holophaga	0.0236	0.0273	0.0184	0.0875	0.0388	0.0748	0.101	0.0576	0.0725
Lysobacter	0.0164	0.02	0.0184	0.0154	0.0135	0.0139	0.1496	0.1238	0.0845
Dyadobacter	0.0036	0.0328	0.0239	0.0206	0.0135	0.0383	0.0898	0.1373	0.088
Pricia	0.0164	0.0018	0	0.0171	0.0118	0.0052	0.0131	0.0034	0.3675
Bosea	0.0073	0.0073	0.0129	0.0223	0.0135	0.0139	0.1178	0.1305	0.0966
Acidovorax	0.0182	0.0328	0.0184	0.0017	0.0169	0.0365	0.073	0.1492	0.069
Solitalea	0	0	0.0018	0	0	0.0017	0.144	0.0797	0.0569
Micavibrio	0	0	0.0018	0.0017	0.0017	0.0087	0.0468	0.0543	0.138
Planctomicrobium	0.0109	0.0146	0.0055	0.012	0.0101	0.0244	0.0019	0.0017	0.1363
Moheibacter	0.0018	0.0018	0.0018	0.0034	0	0	0.0037	0.0051	0.1346

## Sheet: Table S6
Table S6 The indicator bacteria with linear discriminant analysis (LDA) score > 3 between T1 and T3 soils.
NO	Feature	Level	log_hm	Group	LDA score	P value
e4	Bacteria.Proteobacteria.Gammaproteobacteria.Xanthomonadales.Xanthomonadaceae	Family	3.82286	T3	3.08514	0.0495346
f1	Bacteria.Verrucomicrobia.Verrucomicrobiae.Pedosphaerales	Order	4.24699	T1	3.23748	0.0495346
d4	Bacteria.Proteobacteria.Gammaproteobacteria.Betaproteobacteriales.Chromobacteriaceae	Family	4.86694	T3	4.55913	0.0495346
h	Bacteria.Actinobacteria.Acidimicrobiia.Microtrichales	Order	3.97635	T1	3.0503	0.0495346
c4	Bacteria.Proteobacteria.Deltaproteobacteria.Bdellovibrionales	Order	3.84714	T3	3.39978	0.0495346
b2	Bacteria.Proteobacteria.Alphaproteobacteria.Elsterales	Order	3.99925	T1	3.33255	0.0495346
b7	Bacteria.Proteobacteria.Alphaproteobacteria.Rhizobiales	Order	4.82614	T1	3.62619	0.0495346
z	Bacteria.Patescibacteria.Parcubacteria.Candidatus_Yanofskybacteria	Order	3.5325	T1	3.03482	0.0495346
b8	Bacteria.Proteobacteria.Alphaproteobacteria.Sphingomonadales.Sphingomonadaceae.Sphingomonas	Genus	4.44656	T3	3.51298	0.0495346
e2	Bacteria.Proteobacteria.Gammaproteobacteria.Pseudomonadales.Pseudomonadaceae	Family	4.49798	T3	4.15557	0.0495346
e1	Bacteria.Proteobacteria.Gammaproteobacteria.Pseudomonadales.Pseudomonadaceae.Pseudomonas	Genus	4.49798	T3	4.11257	0.0495346
e7	Bacteria.Verrucomicrobia.Verrucomicrobiae.Opitutales.Opitutaceae.Lacunisphaera	Genus	3.76754	T1	3.16865	0.0495346
a4	Bacteria.Planctomycetes.Phycisphaerae.Tepidisphaerales.WD2101_soil_group	Family	4.11919	T1	3.09862	0.0495346
c2	Bacteria.Proteobacteria.Deltaproteobacteria.Bdellovibrionales.Bdellovibrionaceae.Bdellovibrio	Genus	3.82246	T3	3.37054	0.0495346
e3	Bacteria.Proteobacteria.Gammaproteobacteria.Pseudomonadales	Order	4.50096	T3	4.17188	0.0495346
a8	Bacteria.Planctomycetes.Planctomycetacia.Gemmatales	Order	3.89432	T1	3.0352	0.0495346
f4	Bacteria.Verrucomicrobia.Verrucomicrobiae	Class	4.55676	T1	3.62804	0.0495346
d8	Bacteria.Proteobacteria.Gammaproteobacteria.Betaproteobacteriales	Order	5.10509	T3	4.58258	0.0495346
e6	Bacteria.Verrucomicrobia.Verrucomicrobiae.Opitutales.Opitutaceae.Alterococcus	Genus	3.64384	T1	3.03428	0.0495346
k	Bacteria.Actinobacteria.Actinobacteria.Micrococcales.Micrococcaceae	Family	4.29252	T3	3.66938	0.0495346
	Bacteria.Verrucomicrobia	Phylum	4.55676	T1	3.70348	0.0495346
	Bacteria.Proteobacteria	Phylum	5.58274	T3	4.53696	0.0495346
j	Bacteria.Actinobacteria.Actinobacteria.Micrococcales.Micrococcaceae.Pseudarthrobacter	Genus	4.25178	T3	3.5957	0.0495346
a	Bacteria.Acidobacteria.Acidobacteriia.Acidobacteriales	Order	4.31854	T1	3.39411	0.0495346
e0	Bacteria.Proteobacteria.Gammaproteobacteria.Gammaproteobacteria_Incertae_Sedis.Unknown_Family.Acidibacter	Genus	3.81741	T1	3.07253	0.0495346
c	Bacteria.Acidobacteria.Acidobacteriia.Solibacterales.Solibacteraceae_Subgroup_3	Family	4.42707	T1	3.67953	0.0495346
	Bacteria.Patescibacteria	Phylum	5.25225	T3	4.04523	0.0495346
c1	Bacteria.Proteobacteria.Alphaproteobacteria	Class	5.22127	T1	3.67074	0.0495346
b6	Bacteria.Proteobacteria.Alphaproteobacteria.Rhizobiales.Xanthobacteraceae	Family	4.55346	T1	3.29772	0.0495346
i	Bacteria.Actinobacteria.Acidimicrobiia	Class	4.25211	T1	3.39403	0.0495346
y	Bacteria.Patescibacteria.Parcubacteria.Candidatus_Nomurabacteria	Order	4.41473	T1	3.64521	0.0495346
a1	Bacteria.Patescibacteria.Saccharimonadia.Saccharimonadales.Saccharimonadaceae	Family	4.81026	T3	4.39007	0.0495346
d2	Bacteria.Proteobacteria.Gammaproteobacteria.Betaproteobacteriales.Chromobacteriaceae.Pseudogulbenkiania.Pseudogulbenkiania_ferrooxidans_2002	Species	4.85791	T3	4.54824	0.0495346
c7	Bacteria.Proteobacteria.Deltaproteobacteria.Myxococcales.Haliangiaceae	Family	4.10249	T1	3.21699	0.0495346
x	Bacteria.Patescibacteria.Microgenomatia	Class	3.97498	T1	3.23199	0.0495346
e8	Bacteria.Verrucomicrobia.Verrucomicrobiae.Opitutales.Opitutaceae	Family	4.20388	T1	3.61278	0.0495346
d0	Bacteria.Proteobacteria.Deltaproteobacteria	Class	4.65736	T1	3.45511	0.0495346
p	Bacteria.Bacteroidetes.Bacteroidia.Sphingobacteriales.Sphingobacteriaceae	Family	3.59409	T3	3.11973	0.0495346
c3	Bacteria.Proteobacteria.Deltaproteobacteria.Bdellovibrionales.Bdellovibrionaceae	Family	3.83786	T3	3.31586	0.0495346
b1	Bacteria.Proteobacteria.Alphaproteobacteria.Caulobacterales	Order	4.13937	T1	3.22394	0.0495346
f	Bacteria.Acidobacteria.Subgroup_6	Class	4.48028	T1	3.76337	0.0495346
e5	Bacteria.Proteobacteria.Gammaproteobacteria	Class	5.29534	T3	4.68926	0.0495346
a6	Bacteria.Planctomycetes.Phycisphaerae	Class	4.37863	T1	3.31651	0.0495346
d	Bacteria.Acidobacteria.Acidobacteriia.Solibacterales	Order	4.42707	T1	3.59065	0.0495346
	Bacteria.Acidobacteria	Phylum	4.98037	T1	4.22349	0.0495346
d9	Bacteria.Proteobacteria.Gammaproteobacteria.CCD24	Order	3.88648	T1	3.11049	0.0495346
b9	Bacteria.Proteobacteria.Alphaproteobacteria.Sphingomonadales.Sphingomonadaceae	Family	4.56403	T3	3.3534	0.0495346
b3	Bacteria.Proteobacteria.Alphaproteobacteria.Micropepsales.Micropepsaceae	Family	4.11555	T1	3.3176	0.0495346
t	Bacteria.Patescibacteria.ABY1.Candidatus_Magasanikbacteria	Order	3.77518	T1	3.22348	0.0495346
	Bacteria.Planctomycetes	Phylum	4.83075	T1	3.66596	0.0495346
a2	Bacteria.Patescibacteria.Saccharimonadia.Saccharimonadales	Order	4.90377	T3	4.37713	0.0495346
d5	Bacteria.Proteobacteria.Gammaproteobacteria.Betaproteobacteriales.Nitrosomonadaceae.MND1	Genus	4.33328	T1	3.39226	0.0495346
r	Bacteria.Chloroflexi.KD4_96	Class	4.1852	T1	3.3798	0.0495346
l	Bacteria.Actinobacteria.Actinobacteria.Micrococcales	Order	4.32399	T3	3.72899	0.0495346
f0	Bacteria.Verrucomicrobia.Verrucomicrobiae.Pedosphaerales.Pedosphaeraceae	Family	4.24699	T1	3.14518	0.0495346
c6	Bacteria.Proteobacteria.Deltaproteobacteria.Myxococcales.Haliangiaceae.Haliangium	Genus	4.10249	T1	3.16398	0.0495346
c0	Bacteria.Proteobacteria.Alphaproteobacteria.Sphingomonadales	Order	4.56403	T3	3.42162	0.0495346
b5	Bacteria.Proteobacteria.Alphaproteobacteria.Reyranellales	Order	3.808	T1	3.00312	0.0495346
c9	Bacteria.Proteobacteria.Deltaproteobacteria.Myxococcales	Order	4.56253	T1	3.71693	0.0495346
o	Bacteria.Actinobacteria.Thermoleophilia	Class	4.2731	T1	3.39987	0.0495346
f2	Bacteria.Verrucomicrobia.Verrucomicrobiae.Verrucomicrobiales.Verrucomicrobiaceae	Family	3.41352	T3	3.04351	0.0495346
d7	Bacteria.Proteobacteria.Gammaproteobacteria.Betaproteobacteriales.TRA3_20	Family	4.04498	T1	3.26048	0.0495346
s	Bacteria.Gemmatimonadetes.Gemmatimonadetes.Gemmatimonadales.Gemmatimonadaceae.Gemmatimonas	Genus	4.16539	T1	3.13223	0.0495346
w	Bacteria.Patescibacteria.Microgenomatia.Candidatus_Levybacteria	Order	3.78663	T1	3.09589	0.0495346
b4	Bacteria.Proteobacteria.Alphaproteobacteria.Micropepsales	Order	4.11555	T1	3.36011	0.0495346
	Bacteria.Elusimicrobia	Phylum	3.98667	T1	3.29243	0.0495346
d6	Bacteria.Proteobacteria.Gammaproteobacteria.Betaproteobacteriales.Nitrosomonadaceae	Family	4.4538	T1	3.25456	0.0495346
c5	Bacteria.Proteobacteria.Deltaproteobacteria.Myxococcales.BIrii41	Family	4.04612	T1	3.47565	0.0495346
d1	Bacteria.Proteobacteria.Gammaproteobacteria.Betaproteobacteriales.Burkholderiaceae	Family	4.23627	T3	3.71206	0.0495346
v	Bacteria.Patescibacteria.Kazania	Class	3.63697	T1	3.11119	0.0495346
n	Bacteria.Actinobacteria.Thermoleophilia.Gaiellales	Order	4.22907	T1	3.42147	0.0495346
m	Bacteria.Actinobacteria.Actinobacteria	Class	4.53481	T3	3.40134	0.0495346
	Bacteria.Chloroflexi	Phylum	4.68747	T1	3.68605	0.0495346
a5	Bacteria.Planctomycetes.Phycisphaerae.Tepidisphaerales	Order	4.21796	T1	3.20426	0.0495346
b0	Bacteria.Proteobacteria.Alphaproteobacteria.Caulobacterales.Hyphomonadaceae	Family	3.96788	T1	3.01877	0.0495346
g	Bacteria.Actinobacteria.Acidimicrobiia.IMCC26256	Order	3.72841	T1	3.01392	0.0495346
a9	Bacteria.Planctomycetes.Planctomycetacia	Class	4.5616	T1	3.43416	0.0495346
u	Bacteria.Patescibacteria.ABY1	Class	3.91712	T1	3.25048	0.0495346
a0	Bacteria.Patescibacteria.Parcubacteria	Class	5.01818	T1	4.12577	0.0495346
a7	Bacteria.Planctomycetes.Planctomycetacia.Gemmatales.Gemmataceae	Family	3.89432	T1	3.08172	0.0495346
d3	Bacteria.Proteobacteria.Gammaproteobacteria.Betaproteobacteriales.Chromobacteriaceae.Pseudogulbenkiania	Genus	4.8637	T3	4.57504	0.0495346
b	Bacteria.Acidobacteria.Acidobacteriia.Solibacterales.Solibacteraceae_Subgroup_3.Bryobacter	Genus	4.26735	T1	3.46894	0.0495346
f3	Bacteria.Verrucomicrobia.Verrucomicrobiae.Verrucomicrobiales	Order	3.50038	T3	3.09035	0.0495346
q	Bacteria.Bacteroidetes.Bacteroidia.Sphingobacteriales	Order	3.90859	T3	3.19552	0.0495346
c8	Bacteria.Proteobacteria.Deltaproteobacteria.Myxococcales.Sandaracinaceae	Family	3.82374	T1	3.14646	0.0495346
e9	Bacteria.Verrucomicrobia.Verrucomicrobiae.Opitutales	Order	4.20896	T1	3.57418	0.0495346
a3	Bacteria.Patescibacteria.Saccharimonadia	Class	4.90377	T3	4.34499	0.0495346
e	Bacteria.Acidobacteria.Acidobacteriia	Class	4.69843	T1	3.85054	0.0495346

## Sheet: Table S7
Table S7 The indicator bacteria with linear discriminant analysis (LDA) score > 3 between T1 and T5 soils.
NO	Feature	Level	log_hm	Group	LDA score	P value
i4	Bacteria.Proteobacteria.Deltaproteobacteria.Bdellovibrionales.Bdellovibrionaceae.Bdellovibrio	Genus	4.32942	T5	3.99825	0.0495346
f5	Bacteria.Planctomycetes.Planctomycetacia.Isosphaerales.Isosphaeraceae	Family	3.7175	T5	3.21325	0.0495346
m0	Bacteria.Proteobacteria.Gammaproteobacteria.Xanthomonadales.Xanthomonadaceae	Family	4.27933	T5	3.87528	0.0495346
m9	Bacteria.Verrucomicrobia.Verrucomicrobiae.Pedosphaerales	Order	4.24699	T1	3.16634	0.0495346
j9	Bacteria.Proteobacteria.Gammaproteobacteria.Betaproteobacteriales.Chromobacteriaceae	Family	4.11127	T5	3.75015	0.0495346
	Bacteria.Bacteroidetes	Phylum	5.133	T5	4.45773	0.0495346
w	Bacteria.Actinobacteria.Actinobacteria.Propionibacteriales	Order	3.83665	T5	3.03207	0.0495346
h9	Bacteria.Proteobacteria.Alphaproteobacteria.Sphingomonadales.Sphingomonadaceae.Sphingopyxis	Genus	3.67298	T5	3.3663	0.0495346
m	Bacteria.Actinobacteria.Acidimicrobiia.Microtrichales	Order	3.97635	T1	3.35457	0.0495346
n2	Bacteria.Verrucomicrobia.Verrucomicrobiae.Verrucomicrobiales.Verrucomicrobiaceae.Prosthecobacter	Genus	3.41621	T5	3.12203	0.0495346
i6	Bacteria.Proteobacteria.Deltaproteobacteria.Bdellovibrionales	Order	4.3317	T5	3.98242	0.0495346
g5	Bacteria.Proteobacteria.Alphaproteobacteria.Elsterales	Order	3.99925	T1	3.50526	0.0495346
h4	Bacteria.Proteobacteria.Alphaproteobacteria.Rhizobiales.Rhizobiales_Incertae_Sedis	Family	3.94403	T1	3.13464	0.0495346
a9	Bacteria.Bacteroidetes.Bacteroidia.Flavobacteriales.Flavobacteriaceae	Family	4.45161	T5	4.06557	0.0495346
a7	Bacteria.Bacteroidetes.Bacteroidia.Flavobacteriales.Crocinitomicaceae.Fluviicola	Genus	3.31519	T5	3.01799	0.0495346
a3	Bacteria.Bacteroidetes.Bacteroidia.Chitinophagales.Chitinophagaceae	Family	4.6212	T5	3.97464	0.0495346
e3	Bacteria.Patescibacteria.Parcubacteria.Candidatus_Yanofskybacteria	Order	3.5325	T1	3.09793	0.0495346
m2	Bacteria.Proteobacteria.Gammaproteobacteria	Class	5.33092	T5	4.76546	0.0495346
n1	Bacteria.Verrucomicrobia.Verrucomicrobiae.Verrucomicrobiales.Rubritaleaceae	Family	3.42613	T5	3.05661	0.0495346
h7	Bacteria.Proteobacteria.Alphaproteobacteria.Sphingomonadales.Sphingomonadaceae.Sphingomonas	Genus	4.64142	T5	4.04202	0.0495346
l3	Bacteria.Proteobacteria.Gammaproteobacteria.Pseudomonadales.Pseudomonadaceae	Family	5.019	T5	4.70694	0.0495346
c5	Bacteria.Elusimicrobia.Lineage_IIb	Class	3.55302	T1	3.18494	0.0495346
c4	Bacteria.Elusimicrobia.Lineage_IIa	Class	3.50897	T1	3.10324	0.0495346
l2	Bacteria.Proteobacteria.Gammaproteobacteria.Pseudomonadales.Pseudomonadaceae.Pseudomonas	Genus	5.01885	T5	4.71242	0.0495346
m4	Bacteria.Verrucomicrobia.Verrucomicrobiae.Opitutales.Opitutaceae.Lacunisphaera	Genus	3.76754	T1	3.20637	0.0495346
i3	Bacteria.Proteobacteria.Deltaproteobacteria.Bdellovibrionales.Bdellovibrionaceae.Bdellovibrio.Bdellovibrio_sp_MPA	Species	3.66227	T5	3.33641	0.0495346
l8	Bacteria.Proteobacteria.Gammaproteobacteria.Xanthomonadales.Xanthomonadaceae.Luteimonas	Genus	3.87253	T5	3.52229	0.0495346
r	Bacteria.Actinobacteria.Actinobacteria.Micrococcales.Micrococcaceae.Paenarthrobacter	Genus	3.6973	T5	3.31702	0.0495346
l7	Bacteria.Proteobacteria.Gammaproteobacteria.Xanthomonadales.Xanthomonadaceae.Arenimonas	Genus	3.72382	T5	3.15621	0.0495346
f0	Bacteria.Planctomycetes.Phycisphaerae.Phycisphaerales	Order	3.71528	T1	3.08835	0.0495346
j3	Bacteria.Proteobacteria.Gammaproteobacteria.Betaproteobacteriales.Burkholderiaceae.Achromobacter.Achromobacter_xylosoxidans_subsp_xylosoxidans	Species	3.36717	T5	3.06604	0.0495346
h5	Bacteria.Proteobacteria.Alphaproteobacteria.Rhizobiales.Xanthobacteraceae.Bradyrhizobium	Genus	3.98743	T5	3.19606	0.0495346
h	Bacteria.Acidobacteria.Blastocatellia_Subgroup_4.Blastocatellales	Order	3.71632	T5	3.06152	0.0495346
i2	Bacteria.Proteobacteria.Deltaproteobacteria.Bdellovibrionales.Bdellovibrionaceae.Bdellovibrio.Bdellovibrio_bacteriovorus	Species	3.49444	T5	3.15515	0.0495346
n3	Bacteria.Verrucomicrobia.Verrucomicrobiae.Verrucomicrobiales.Verrucomicrobiaceae.Roseimicrobium	Genus	3.50894	T5	3.11744	0.0495346
l4	Bacteria.Proteobacteria.Gammaproteobacteria.Pseudomonadales	Order	5.01943	T5	4.71143	0.0495346
f3	Bacteria.Planctomycetes.Planctomycetacia.Gemmatales	Order	3.89432	T1	3.26246	0.0495346
h0	Bacteria.Proteobacteria.Alphaproteobacteria.Rhizobiales.Rhizobiaceae.Ensifer.Ensifer_adhaerens	Species	3.40739	T5	3.07313	0.0495346
j	Bacteria.Acidobacteria.Holophagae	Class	3.61564	T1	3.0689	0.0495346
k5	Bacteria.Proteobacteria.Gammaproteobacteria.Betaproteobacteriales	Order	4.79931	T5	3.58504	0.0495346
m3	Bacteria.Verrucomicrobia.Verrucomicrobiae.Opitutales.Opitutaceae.Alterococcus	Genus	3.64384	T1	3.05677	0.0495346
g2	Bacteria.Proteobacteria.Alphaproteobacteria.Caulobacterales.Hyphomonadaceae.SWB02	Genus	3.77818	T1	3.11002	0.0495346
a4	Bacteria.Bacteroidetes.Bacteroidia.Chitinophagales.Saprospiraceae	Family	3.84764	T1	3.26446	0.0495346
t	Bacteria.Actinobacteria.Actinobacteria.Micrococcales.Micrococcaceae	Family	4.67452	T5	4.26085	0.0495346
	Bacteria.Verrucomicrobia	Phylum	4.55676	T1	3.25362	0.0495346
a1	Bacteria.Bacteroidetes.Bacteroidia.Chitinophagales.Chitinophagaceae.Chitinophaga	Genus	3.72544	T5	3.42994	0.0495346
e8	Bacteria.Planctomycetes.OM190	Class	3.64948	T1	3.19593	0.0495346
j6	Bacteria.Proteobacteria.Gammaproteobacteria.Betaproteobacteriales.Burkholderiaceae	Family	4.27952	T5	3.75981	0.0495346
	Bacteria.Proteobacteria	Phylum	5.6284	T5	4.70462	0.0495346
o	Bacteria.Actinobacteria.Actinobacteria.Frankiales	Order	3.67164	T1	3.03813	0.0495346
s	Bacteria.Actinobacteria.Actinobacteria.Micrococcales.Micrococcaceae.Pseudarthrobacter	Genus	4.62168	T5	4.2331	0.0495346
h3	Bacteria.Proteobacteria.Alphaproteobacteria.Rhizobiales.Rhizobiaceae	Family	3.97455	T5	3.52958	0.0495346
a	Bacteria.Acidobacteria.Acidobacteriia.Acidobacteriales	Order	4.31854	T1	3.65519	0.0495346
k1	Bacteria.Proteobacteria.Gammaproteobacteria.Betaproteobacteriales.Nitrosomonadaceae.MND1	Genus	4.33328	T1	3.66629	0.0495346
f4	Bacteria.Planctomycetes.Planctomycetacia.Isosphaerales.Isosphaeraceae.Singulisphaera	Genus	3.45615	T5	3.1215	0.0495346
e0	Bacteria.Patescibacteria.Parcubacteria.Candidatus_Azambacteria	Order	3.63447	T1	3.07451	0.0495346
k2	Bacteria.Proteobacteria.Gammaproteobacteria.Betaproteobacteriales.Nitrosomonadaceae.Nitrosospira	Genus	3.84391	T5	3.50795	0.0495346
m1	Bacteria.Proteobacteria.Gammaproteobacteria.Xanthomonadales	Order	4.44193	T5	3.98811	0.0495346
	Bacteria.Patescibacteria	Phylum	5.21275	T1	4.20405	0.0495346
n	Bacteria.Actinobacteria.Acidimicrobiia	Class	4.25211	T1	3.71306	0.0495346
c1	Bacteria.Chloroflexi.Anaerolineae.SBR1031	Order	3.87696	T1	3.37625	0.0495346
e2	Bacteria.Patescibacteria.Parcubacteria.Candidatus_Nomurabacteria	Order	4.41473	T1	4.00637	0.0495346
e5	Bacteria.Patescibacteria.Saccharimonadia.Saccharimonadales.Saccharimonadaceae	Family	4.76733	T5	4.33156	0.0495346
c0	Bacteria.Chloroflexi.Anaerolineae.SBR1031.A4b	Family	3.70796	T1	3.16224	0.0495346
	Bacteria.Armatimonadetes	Phylum	3.58979	T1	3.08478	0.0495346
c7	Bacteria.Fibrobacteres.Fibrobacteria.Fibrobacterales	Order	3.34171	T1	3.01437	0.0495346
h8	Bacteria.Proteobacteria.Alphaproteobacteria.Sphingomonadales.Sphingomonadaceae.Sphingopyxis.Sphingopyxis_macrogoltabida	Species	3.66977	T5	3.32993	0.0495346
f7	Bacteria.Planctomycetes.Planctomycetacia.Pirellulales.Pirellulaceae.Pirellula	Genus	3.93432	T1	3.2223	0.0495346
j7	Bacteria.Proteobacteria.Gammaproteobacteria.Betaproteobacteriales.Chromobacteriaceae.Pseudogulbenkiania.Pseudogulbenkiania_ferrooxidans_2002	Species	4.10364	T5	3.75292	0.0495346
i9	Bacteria.Proteobacteria.Deltaproteobacteria.Myxococcales.Haliangiaceae	Family	4.10249	T1	3.58935	0.0495346
	Bacteria.Chlamydiae	Phylum	4.27075	T1	3.66367	0.0495346
d8	Bacteria.Patescibacteria.Microgenomatia	Class	3.97498	T1	3.39618	0.0495346
b1	Bacteria.Bacteroidetes.Bacteroidia.Sphingobacteriales.Sphingobacteriaceae.Pedobacter	Genus	4.29376	T5	3.97819	0.0495346
m6	Bacteria.Verrucomicrobia.Verrucomicrobiae.Opitutales.Opitutaceae	Family	4.20388	T1	3.64926	0.0495346
j2	Bacteria.Proteobacteria.Deltaproteobacteria	Class	4.65736	T1	3.60495	0.0495346
b2	Bacteria.Bacteroidetes.Bacteroidia.Sphingobacteriales.Sphingobacteriaceae	Family	4.34105	T5	4.01084	0.0495346
a6	Bacteria.Bacteroidetes.Bacteroidia.Cytophagales.Microscillaceae.Ohtaekwangia	Genus	3.56285	T5	3.0974	0.0495346
i5	Bacteria.Proteobacteria.Deltaproteobacteria.Bdellovibrionales.Bdellovibrionaceae	Family	4.33109	T5	3.97181	0.0495346
g4	Bacteria.Proteobacteria.Alphaproteobacteria.Caulobacterales	Order	4.13937	T1	3.26788	0.0495346
k	Bacteria.Acidobacteria.Subgroup_6	Class	4.48028	T1	3.9258	0.0495346
i	Bacteria.Acidobacteria.Holophagae.Subgroup_7	Order	3.59061	T1	3.17185	0.0495346
x	Bacteria.Actinobacteria.Actinobacteria	Class	4.85098	T5	4.31066	0.0495346
f1	Bacteria.Planctomycetes.Phycisphaerae	Class	4.37863	T1	3.53041	0.0495346
	Bacteria.Gemmatimonadetes	Phylum	4.61184	T1	3.50971	0.0495346
e	Bacteria.Acidobacteria.Acidobacteriia.Solibacterales	Order	4.42707	T1	3.79947	0.0495346
	Bacteria.Acidobacteria	Phylum	4.98037	T1	4.37729	0.0495346
h2	Bacteria.Proteobacteria.Alphaproteobacteria.Rhizobiales.Rhizobiaceae.Mesorhizobium	Genus	3.52458	T5	3.06337	0.0495346
d	Bacteria.Acidobacteria.Acidobacteriia.Solibacterales.Solibacteraceae_Subgroup_3	Family	4.42707	T1	3.80766	0.0495346
b5	Bacteria.Chlamydiae.Chlamydiae.Chlamydiales.cvE6	Family	3.85637	T1	3.22402	0.0495346
b0	Bacteria.Bacteroidetes.Bacteroidia.Flavobacteriales	Order	4.50602	T5	4.10817	0.0495346
c6	Bacteria.Fibrobacteres.Fibrobacteria.Fibrobacterales.Fibrobacteraceae	Family	3.34171	T1	3.02338	0.0495346
k6	Bacteria.Proteobacteria.Gammaproteobacteria.CCD24	Order	3.88648	T1	3.27762	0.0495346
h6	Bacteria.Proteobacteria.Alphaproteobacteria.Rhizobiales.Xanthobacteraceae.Pseudolabrys	Genus	4.179	T1	3.00976	0.0495346
d2	Bacteria.Gemmatimonadetes.Gemmatimonadetes	Class	4.58066	T1	3.66715	0.0495346
	Bacteria.Fibrobacteres	Phylum	3.45812	T1	3.11657	0.0495346
i0	Bacteria.Proteobacteria.Alphaproteobacteria.Sphingomonadales.Sphingomonadaceae	Family	4.77377	T5	4.18203	0.0495346
k7	Bacteria.Proteobacteria.Gammaproteobacteria.Diplorickettsiales	Order	3.75296	T1	3.08715	0.0495346
g6	Bacteria.Proteobacteria.Alphaproteobacteria.Micropepsales.Micropepsaceae	Family	4.11555	T1	3.53741	0.0495346
g	Bacteria.Acidobacteria.Blastocatellia_Subgroup_4.Blastocatellales.Blastocatellaceae	Family	3.71632	T5	3.11953	0.0495346
	Bacteria.BRC1	Phylum	3.52838	T5	3.19192	0.0495346
	Bacteria.Planctomycetes	Phylum	4.83075	T1	4.11694	0.0495346
e6	Bacteria.Patescibacteria.Saccharimonadia.Saccharimonadales	Order	4.83849	T5	4.25126	0.0495346
c3	Bacteria.Chloroflexi.KD4_96	Class	4.1852	T1	3.52114	0.0495346
k0	Bacteria.Proteobacteria.Gammaproteobacteria.Betaproteobacteriales.Nitrosomonadaceae.IS_44	Genus	3.65642	T1	3.08262	0.0495346
u	Bacteria.Actinobacteria.Actinobacteria.Micrococcales	Order	4.71198	T5	4.26954	0.0495346
m8	Bacteria.Verrucomicrobia.Verrucomicrobiae.Pedosphaerales.Pedosphaeraceae	Family	4.24699	T1	3.2333	0.0495346
i8	Bacteria.Proteobacteria.Deltaproteobacteria.Myxococcales.Haliangiaceae.Haliangium	Genus	4.10249	T1	3.58436	0.0495346
i1	Bacteria.Proteobacteria.Alphaproteobacteria.Sphingomonadales	Order	4.77377	T5	4.13585	0.0495346
g8	Bacteria.Proteobacteria.Alphaproteobacteria.Reyranellales	Order	3.808	T1	3.01433	0.0495346
a8	Bacteria.Bacteroidetes.Bacteroidia.Flavobacteriales.Flavobacteriaceae.Flavobacterium	Genus	4.42798	T5	4.05036	0.0495346
j1	Bacteria.Proteobacteria.Deltaproteobacteria.Myxococcales	Order	4.56253	T1	4.10145	0.0495346
a2	Bacteria.Bacteroidetes.Bacteroidia.Chitinophagales.Chitinophagaceae.Flavisolibacter	Genus	3.73938	T5	3.04227	0.0495346
z	Bacteria.Actinobacteria.Thermoleophilia	Class	4.2731	T1	3.56256	0.0495346
n4	Bacteria.Verrucomicrobia.Verrucomicrobiae.Verrucomicrobiales.Verrucomicrobiaceae	Family	3.77974	T5	3.44126	0.0495346
k4	Bacteria.Proteobacteria.Gammaproteobacteria.Betaproteobacteriales.TRA3_20	Family	4.04498	T1	3.55442	0.0495346
c9	Bacteria.Gemmatimonadetes.Gemmatimonadetes.Gemmatimonadales.Gemmatimonadaceae.Gemmatimonas	Genus	4.16539	T1	3.20864	0.0495346
c	Bacteria.Acidobacteria.Acidobacteriia.Solibacterales.Solibacteraceae_Subgroup_3.Candidatus_Solibacter	Genus	3.85057	T1	3.21212	0.0495346
d7	Bacteria.Patescibacteria.Microgenomatia.Candidatus_Levybacteria	Order	3.78663	T1	3.20605	0.0495346
d0	Bacteria.Gemmatimonadetes.Gemmatimonadetes.Gemmatimonadales.Gemmatimonadaceae	Family	4.58066	T1	3.59921	0.0495346
l6	Bacteria.Proteobacteria.Gammaproteobacteria.Xanthomonadales.Rhodanobacteraceae	Family	3.92926	T5	3.3256	0.0495346
d1	Bacteria.Gemmatimonadetes.Gemmatimonadetes.Gemmatimonadales	Order	4.58066	T1	3.69751	0.0495346
g7	Bacteria.Proteobacteria.Alphaproteobacteria.Micropepsales	Order	4.11555	T1	3.48465	0.0495346
l0	Bacteria.Proteobacteria.Gammaproteobacteria.Gammaproteobacteria_Incertae_Sedis	Order	3.8679	T1	3.29077	0.0495346
	Bacteria.Elusimicrobia	Phylum	3.98667	T1	3.59886	0.0495346
g0	Bacteria.Planctomycetes.Planctomycetacia.Planctomycetales	Order	3.99919	T1	3.38109	0.0495346
b	Bacteria.Acidobacteria.Acidobacteriia.Solibacterales.Solibacteraceae_Subgroup_3.Bryobacter	Genus	4.26735	T1	3.64467	0.0495346
v	Bacteria.Actinobacteria.Actinobacteria.Propionibacteriales.Nocardioidaceae	Family	3.83552	T5	3.05594	0.0495346
d4	Bacteria.Patescibacteria.ABY1.Candidatus_Magasanikbacteria	Order	3.77518	T1	3.3851	0.0495346
k3	Bacteria.Proteobacteria.Gammaproteobacteria.Betaproteobacteriales.Nitrosomonadaceae	Family	4.4538	T1	3.55981	0.0495346
b6	Bacteria.Chlamydiae.Chlamydiae.Chlamydiales	Order	4.27075	T1	3.68058	0.0495346
i7	Bacteria.Proteobacteria.Deltaproteobacteria.Myxococcales.BIrii41	Family	4.04612	T1	3.68275	0.0495346
y	Bacteria.Actinobacteria.Thermoleophilia.Gaiellales	Order	4.22907	T1	3.48839	0.0495346
d6	Bacteria.Patescibacteria.Kazania	Class	3.63697	T1	3.27766	0.0495346
n6	Bacteria.Verrucomicrobia.Verrucomicrobiae	Class	4.55676	T1	3.23692	0.0495346
a0	Bacteria.BRC1.soil_bacterium_WWH121	Class	3.52838	T5	3.2018	0.0495346
l1	Bacteria.Proteobacteria.Gammaproteobacteria.Pseudomonadales.Pseudomonadaceae.Pseudomonas.Pseudomonas_kilonensis	Species	3.54663	T5	3.23808	0.0495346
f6	Bacteria.Planctomycetes.Planctomycetacia.Isosphaerales	Order	3.7175	T5	3.19614	0.0495346
l9	Bacteria.Proteobacteria.Gammaproteobacteria.Xanthomonadales.Xanthomonadaceae.Pseudoxanthomonas	Genus	3.54455	T5	3.21584	0.0495346
g9	Bacteria.Proteobacteria.Alphaproteobacteria.Rhizobiales.Devosiaceae	Family	4.02017	T5	3.01399	0.0495346
k9	Bacteria.Proteobacteria.Gammaproteobacteria.Gammaproteobacteria_Incertae_Sedis.Unknown_Family	Family	3.8679	T1	3.26975	0.0495346
b7	Bacteria.Chlamydiae.Chlamydiae	Class	4.27075	T1	3.65658	0.0495346
b9	Bacteria.Chloroflexi.Anaerolineae.Anaerolineales	Order	3.58171	T1	3.04647	0.0495346
m5	Bacteria.Verrucomicrobia.Verrucomicrobiae.Opitutales.Opitutaceae.Opitutus.Opitutus_sp_VeGlc2	Species	1.56257	T1	3.23972	0.036904
e1	Bacteria.Patescibacteria.Parcubacteria.Candidatus_Kaiserbacteria	Order	4.35674	T1	3.31136	0.0495346
b8	Bacteria.Chloroflexi.Anaerolineae.Anaerolineales.Anaerolineaceae	Family	3.58171	T1	3.06823	0.0495346
	Bacteria.Chloroflexi	Phylum	4.68747	T1	4.13599	0.0495346
g3	Bacteria.Proteobacteria.Alphaproteobacteria.Caulobacterales.Hyphomonadaceae	Family	3.96788	T1	3.37674	0.0495346
l	Bacteria.Actinobacteria.Acidimicrobiia.IMCC26256	Order	3.72841	T1	3.22521	0.0495346
g1	Bacteria.Planctomycetes.Planctomycetacia	Class	4.5616	T1	3.74445	0.0495346
d5	Bacteria.Patescibacteria.ABY1	Class	3.91712	T1	3.50325	0.0495346
e4	Bacteria.Patescibacteria.Parcubacteria	Class	5.01818	T1	4.47699	0.0495346
f2	Bacteria.Planctomycetes.Planctomycetacia.Gemmatales.Gemmataceae	Family	3.89432	T1	3.25145	0.0495346
q	Bacteria.Actinobacteria.Actinobacteria.Micrococcales.Micrococcaceae.Paenarthrobacter.Paenarthrobacter_nitroguajacolicus	Species	3.6973	T5	3.31518	0.0495346
j8	Bacteria.Proteobacteria.Gammaproteobacteria.Betaproteobacteriales.Chromobacteriaceae.Pseudogulbenkiania	Genus	4.10686	T5	3.71881	0.0495346
d9	Bacteria.Patescibacteria.Parcubacteria.Candidatus_Adlerbacteria	Order	4.08614	T1	3.49639	0.0495346
c8	Bacteria.Fibrobacteres.Fibrobacteria	Class	3.34171	T1	3.02061	0.0495346
k8	Bacteria.Proteobacteria.Gammaproteobacteria.Gammaproteobacteria_Incertae_Sedis.Unknown_Family.Acidibacter	Genus	3.81741	T1	3.20521	0.0495346
j4	Bacteria.Proteobacteria.Gammaproteobacteria.Betaproteobacteriales.Burkholderiaceae.Achromobacter	Genus	3.37893	T5	3.04334	0.0495346
j5	Bacteria.Proteobacteria.Gammaproteobacteria.Betaproteobacteriales.Burkholderiaceae.Burkholderia_Caballeronia_Paraburkholderia	Genus	3.57222	T5	3.15734	0.0495346
b4	Bacteria.Bacteroidetes.Bacteroidia	Class	5.13055	T5	4.54395	0.0495346
p	Bacteria.Actinobacteria.Actinobacteria.Micrococcales.Microbacteriaceae	Family	3.47083	T5	3.03725	0.0495346
n5	Bacteria.Verrucomicrobia.Verrucomicrobiae.Verrucomicrobiales	Order	3.94016	T5	3.56417	0.0495346
l5	Bacteria.Proteobacteria.Gammaproteobacteria.Xanthomonadales.Rhodanobacteraceae.Rhodanobacter	Genus	3.62895	T5	3.24266	0.0495346
b3	Bacteria.Bacteroidetes.Bacteroidia.Sphingobacteriales	Order	4.39623	T5	3.99117	0.0495346
f8	Bacteria.Planctomycetes.Planctomycetacia.Pirellulales.Pirellulaceae	Family	4.20684	T1	3.52002	0.0495346
j0	Bacteria.Proteobacteria.Deltaproteobacteria.Myxococcales.Sandaracinaceae	Family	3.82374	T1	3.37445	0.0495346
h1	Bacteria.Proteobacteria.Alphaproteobacteria.Rhizobiales.Rhizobiaceae.Ensifer	Genus	3.40739	T5	3.04832	0.0495346
e9	Bacteria.Planctomycetes.Phycisphaerae.Phycisphaerales.Phycisphaeraceae	Family	3.71528	T1	3.14302	0.0495346
a5	Bacteria.Bacteroidetes.Bacteroidia.Chitinophagales	Order	4.66408	T5	3.88494	0.0495346
m7	Bacteria.Verrucomicrobia.Verrucomicrobiae.Opitutales	Order	4.20896	T1	3.62348	0.0495346
e7	Bacteria.Patescibacteria.Saccharimonadia	Class	4.83849	T5	4.28321	0.0495346
d3	Bacteria.Omnitrophicaeota.mixed_culture_isolate_koll11	Class	1.73822	T1	3.05741	0.0463016
f	Bacteria.Acidobacteria.Acidobacteriia	Class	4.69843	T1	4.05669	0.0495346
n0	Bacteria.Verrucomicrobia.Verrucomicrobiae.Verrucomicrobiales.Rubritaleaceae.Luteolibacter	Genus	3.42429	T5	3.06444	0.0495346
c2	Bacteria.Chloroflexi.Anaerolineae	Class	4.18117	T1	3.64969	0.0495346
	Bacteria.Actinobacteria	Phylum	4.95593	T5	4.04006	0.0495346
f9	Bacteria.Planctomycetes.Planctomycetacia.Pirellulales	Order	4.20684	T1	3.51213	0.0495346
